# Supplementary material for: Comparative proteomic analysis reveals novel insights into the interaction between rice and Xanthomonas oryzae pv. oryzae
Source: BMC Plant Biol. 2020 Dec 14;20:563. doi: 10.1186/s12870-020-02769-7 (PMC7734852; doi:10.1186/s12870-020-02769-7)
Supplement: Supplementary file 9 — Additional file 9 KEGG pathway enrichment analysis of the differentially abundant Xanthomonas oryzae pv. oryzae (Xoo) and rice proteins between H471 and HHZ. [file 12870_2020_2769_MOESM9_ESM.xlsx]

## Sheet: Table S6
Additional file 9. KEGG pathway enrichment analysis of the differentially abundance Xanthomonas oryzae pv. oryzae (Xoo) and rice proteins between H471 and HHZ.
Xoo/Rice	KEGG Term	KEGG pathway ID	Accession ID	Input number	Background number	All input number	All background number	P-Value	Corrected P-value
Xoo DAPs	Ribosome	xop03010	188577162, 188576350, 188574890, 188575494, 188574889, 188575491, 188576640, 188575511, 188575513, 188575512, 188578564, 188575478, 188575479, 188574982, 188578070, 188575471, 188575477, 188575480, 188575484, 188575489, 188575502, 188579179, 188575501, 188575507, 188575504, 188575505, 188575509	27	54	180	2872	1.40985e-14	5.7804e-13
	RNA degradation	xop03018	188577108, 188575899, 188574749, 188577475, 188577676, 188574765	6	16	180	2872	0.00130596	0.0267723
	Methane metabolism	xop00680	188577863, 188575600, 188578434, 188575899, 188575260	5	18	180	2872	0.00951204	0.129998
	Glycolysis / Gluconeogenesis	xop00010	188575600, 188577863, 188577097, 188578207, 188575899, 188577866	6	30	180	2872	0.0171374	0.175658
	Carbon metabolism	xop01200	188578434, 188574873, 188575600, 188575260, 188575735, 188578207, 188577863, 188577096, 188577866, 188575899, 188577097	11	87	180	2872	0.0275286	0.197215
	Citrate cycle (TCA cycle)	xop00020	188575735, 188577096, 188577097, 188574873, 188578434	5	25	180	2872	0.0288607	0.197215
Rice DAPs	Biosynthesis of secondary metabolites	osa01110	115461474, 115481490, 115481198, 115470096, 115462115, 115446459, 115462257, 115442407, 115447403, 115455713, 115451283, 297601716, 115477130, 115450169, 115478426, 115469784, 115457638, 115443787, 115451243, 115481256, 115444705, 115448691, 115441087, 115481480, 115447405, 115451989, 115459448, 115478398, 115463849, 115459790, 115434516, 115440123, 115474427, 297604962, 115466622, 115481814, 115…	42	775	314	8676	0.00673654	0.252246
	Phenylalanine metabolism	osa00360	115447405, 115447403, 115459448, 115444579, 115462257, 115466622, 115442407, 115467920, 115461474	9	98	314	8676	0.0123457	0.325602
	Flavonoid biosynthesis	osa00941	115466622, 115481480, 115481490	3	18	314	8676	0.0352264	0.325602
	Phenylpropanoid biosynthesis	osa00940	115447405, 115447403, 115459448, 115444579, 115462257, 115466622, 115442407, 115444705, 115461474	9	124	314	8676	0.0430722	0.325602
	Vitamin B6 metabolism	osa00750	115486839, 115480834	2	8	314	8676	0.0454679	0.325602
